# Supplementary material
Source: PubMed Central journal article supplement (PMC4051436)

**Suppl. Figure 1:** Surface (A) and total (B) CTLA-4 expression on primary CD4<sup>+</sup>/FoxP3<sup>-</sup> T conventional and CD4<sup>+</sup>/FoxP3<sup>+</sup> T regulatory cells comparing 2 month old wild-type and Y201V knock-in mice. CTLA-4 expression is displayed as fold change of the mean fluorescent intensity (MFI). Statistical analyses were performed using an unpaired Student's t test (\*\*\*, P < 0.001).

**Suppl. Figure 2:** (A) Total organ cellularity of axillary lymph node (axLN), mesenteric lymph node (mesLN) and spleen (SP) in 8 week old wild-type and Y201V knock-in mice. (B) Absolute numbers of conventional CD4<sup>+</sup> T cells and CD4<sup>+</sup>/FoxP3<sup>+</sup> regulatory T cells in lymph nodes of Y201V knock-in mice and littermate controls. Numbers of activated T effectors and resting naïve T cells are displayed as ratio of CD44<sup>+</sup> over CD62L<sup>hi</sup> CD4<sup>+</sup> T cells. (C) Total cellularity of spleen and lymph nodes in 3 month old Y201V KI and wild-type mice. (D) Overall percentage of activated CD4<sup>+</sup>/CD44<sup>+</sup>, CD4<sup>+</sup>/CD69<sup>+</sup> T cells as well as CD4<sup>+</sup>/FoxP3<sup>+</sup> regulatory T cells in lymph nodes of 3 month old Y201V KI and wild-type mice. Statistical analyses were performed using an unpaired Student's t test (\*, P < 0.05; \*\*, P < 0.01; \*\*\*, P < 0.001).

**Suppl. Figure 3:** CD4<sup>+</sup>/CD44<sup>-</sup>/CD62L<sup>hi</sup> naïve T cells from lymph nodes of 8 week old WT and CTLA-4Y201V knock-in mice were labeled with CFSE and stimulated with soluble anti-CD3 (1ug/ml) and anti-CD28 (1ug/ml) in the presence of 200U/ml IL2 for 3 days. T cell proliferation was measured by flow cytometry based on CFSE dilution.

**Suppl. Figure 4:** Wild-type and Y201V knock-in mice were immunized with MOG<sub>35-55</sub> peptide emulsified in CFA and total cellularity of spleen and CNS (**A**) as well as absolute numbers of total CD4<sup>+</sup> T cells (**B**) were determined at peak disease. (**C**) CTLA-4 surface expression on CD4<sup>+</sup>/FoxP3<sup>-</sup> T effector, CD4<sup>+</sup>/FoxP3<sup>+</sup> T regulatory and CD4<sup>+</sup>/Foxp3<sup>+</sup>/MOG<sup>+</sup> antigen-specific T regulatory cells in the CNS of wild-type and Y201V knock-in mice at peak disease after induction of EAE. Statistical analyses were performed using an unpaired Student's t test (\*, P < 0.05; \*\*, P < 0.01).

**Suppl. Figure 5:** Thymocytes from 8 week old WT and CTLA-4 Y201V knock-in mice were isolated and analyzed by flow cytometry to evaluate the frequency of CD4<sup>+</sup>/FoxP3<sup>+</sup>T regulatory cells (**A**). (**B**) Representative flow plot (left) and quantification (right) of FoxP3 protein expression levels in CD4<sup>+</sup> T regulatory cells.

# Suppl. Figure 1:

**A**

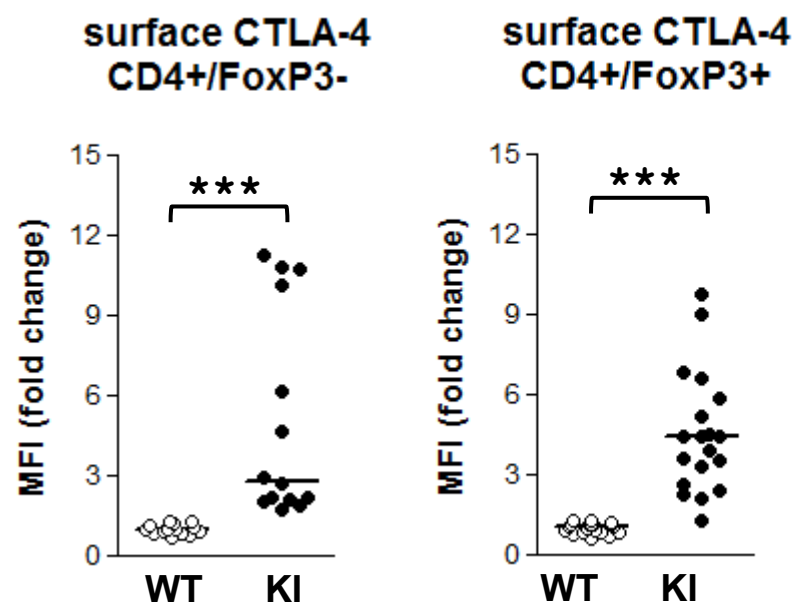

**B**

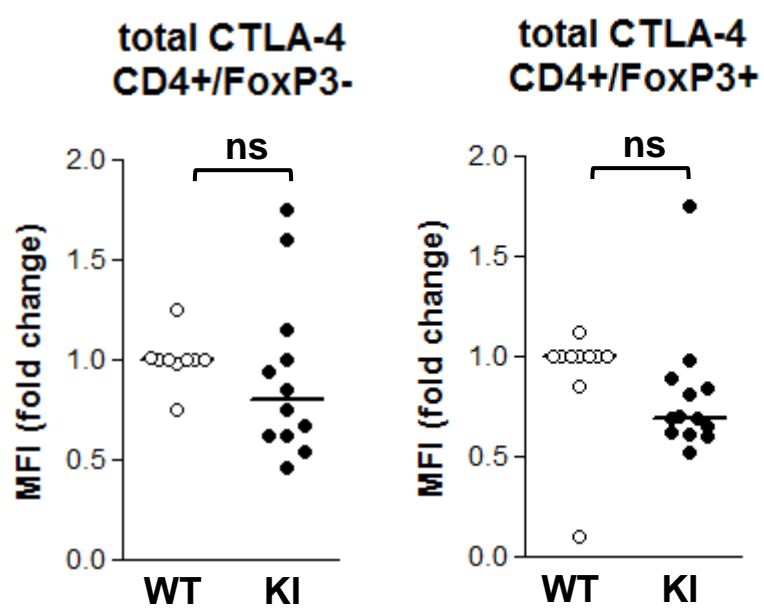

## Suppl. Figure 2:

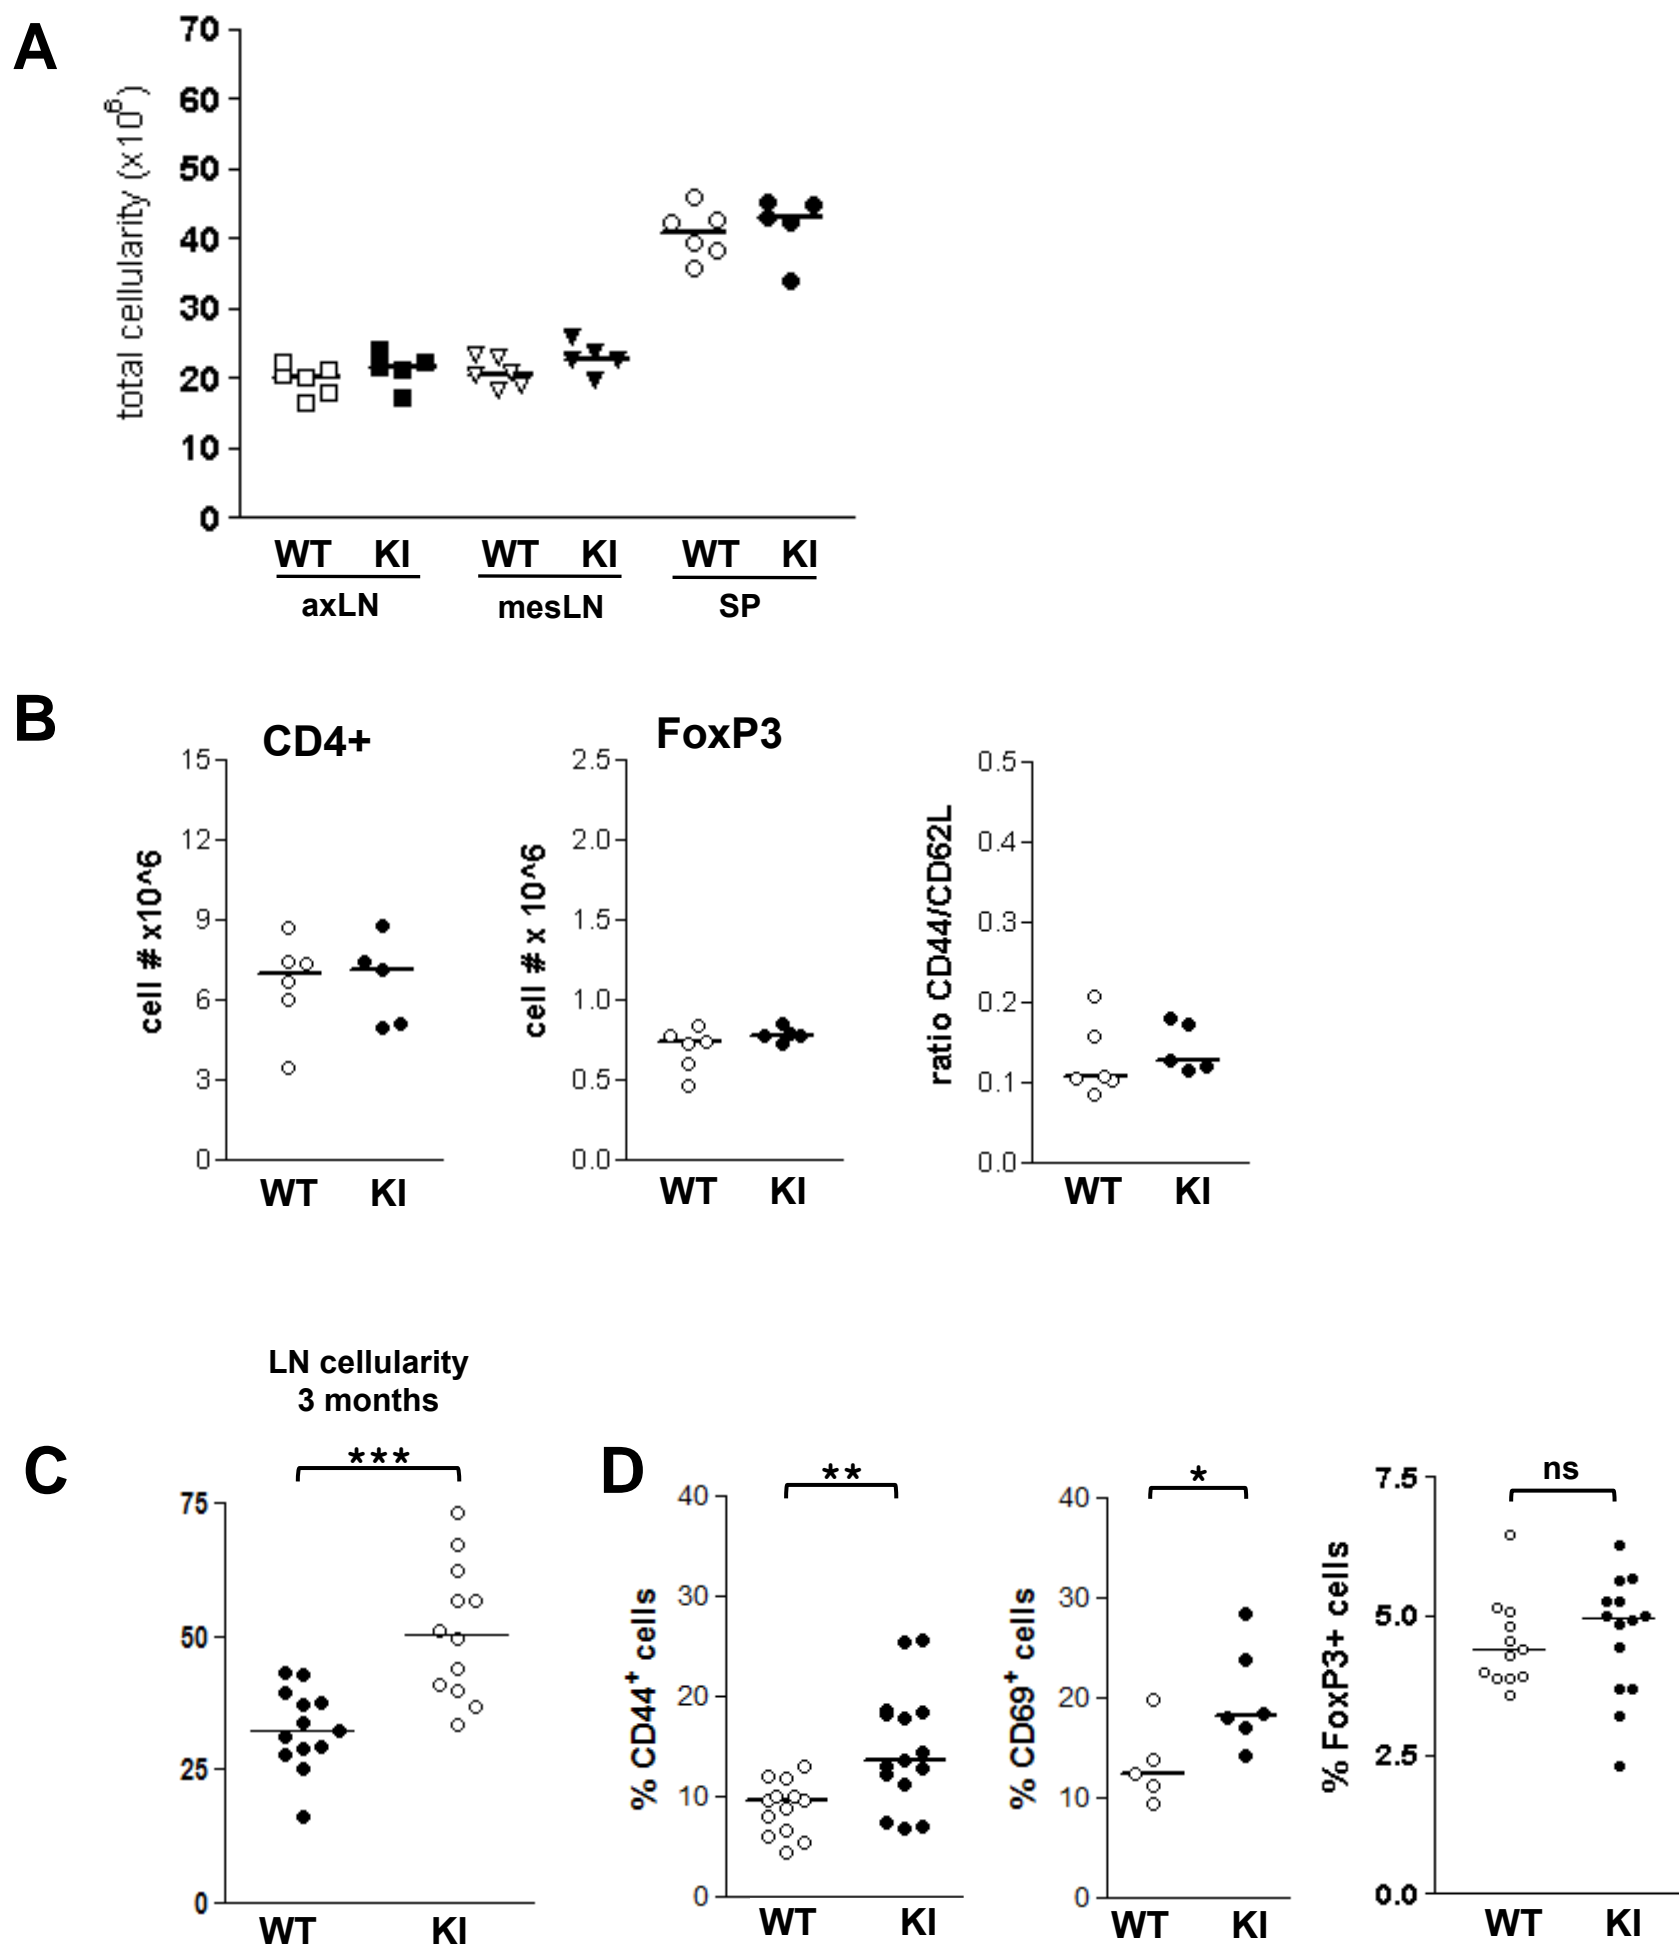

# Suppl. Figure 3:

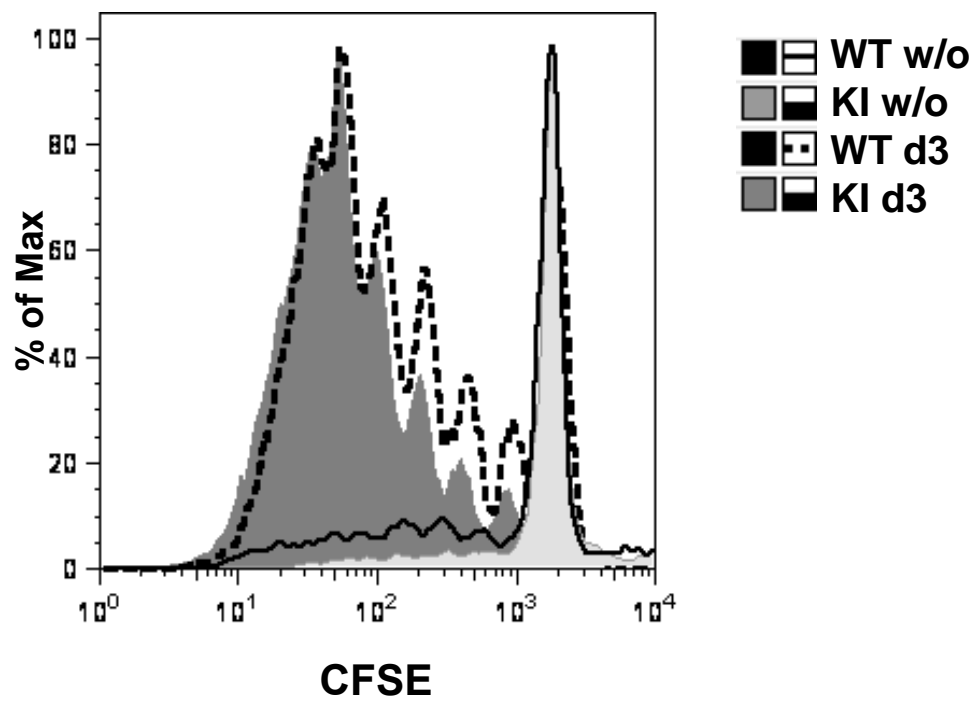

# Suppl. Figure 4:

**A**

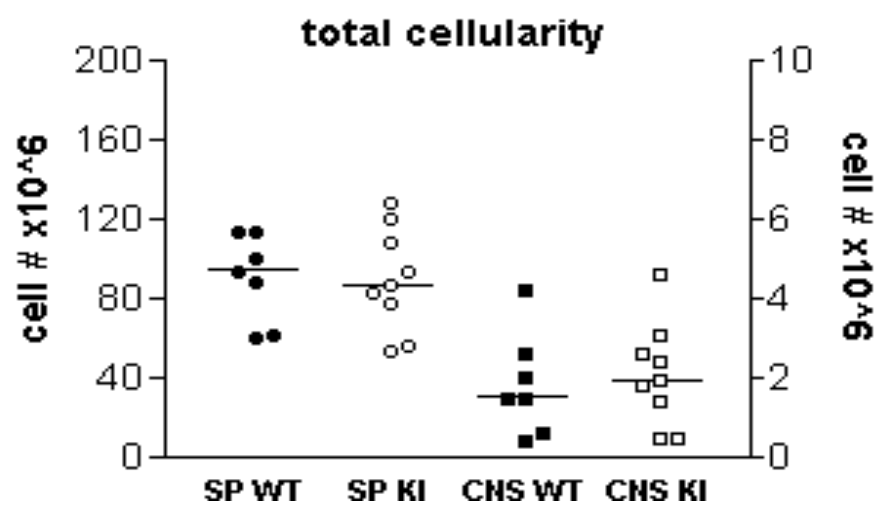

**B**

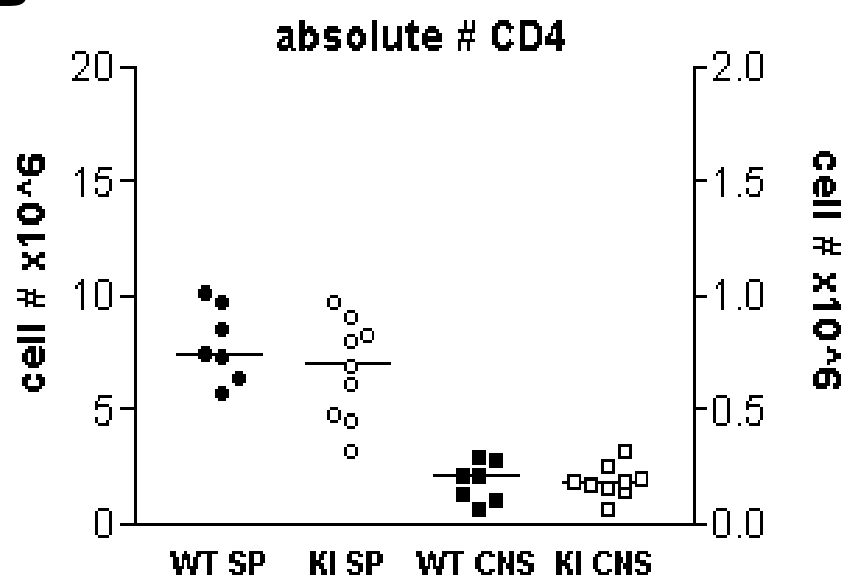

**C**

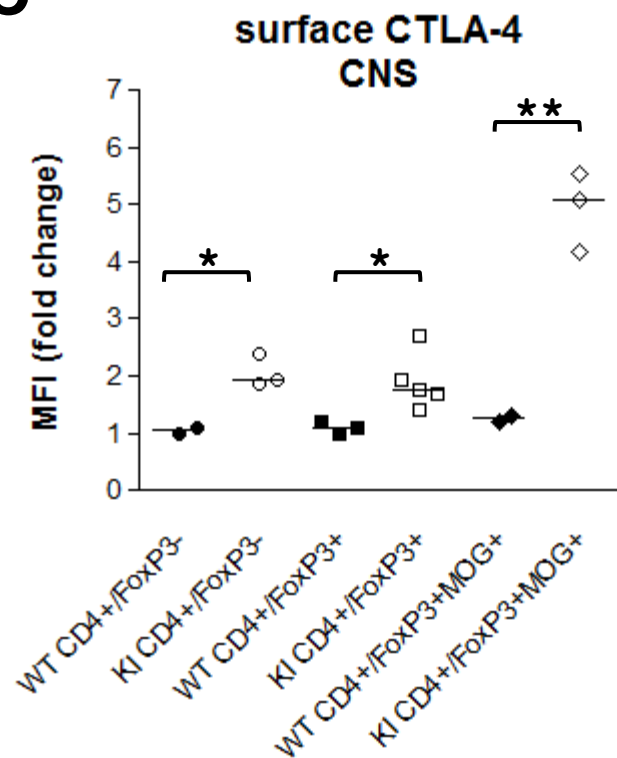

# Suppl. Figure 5:

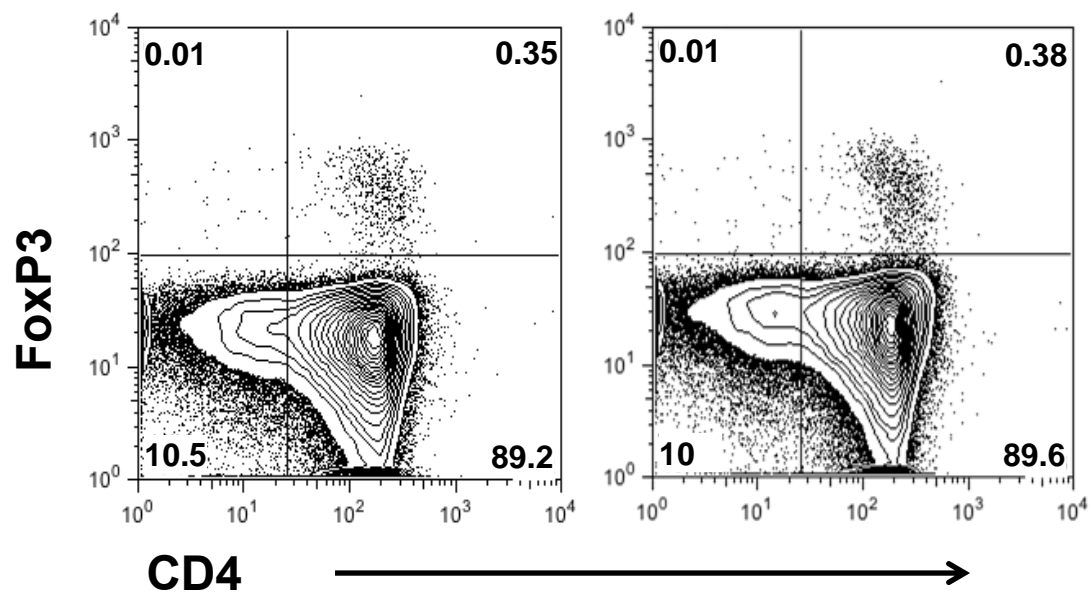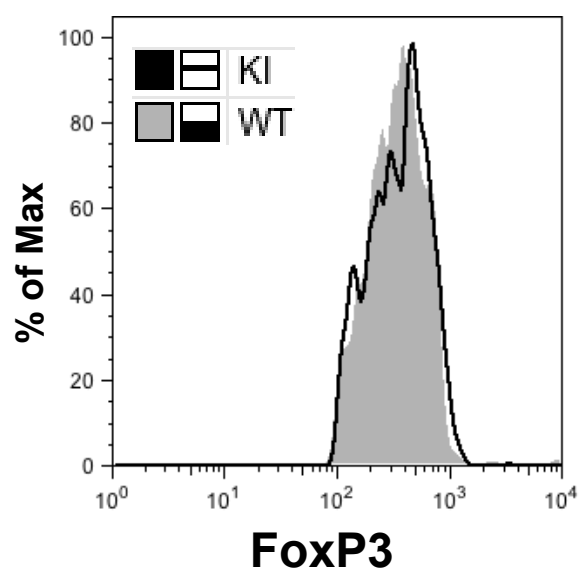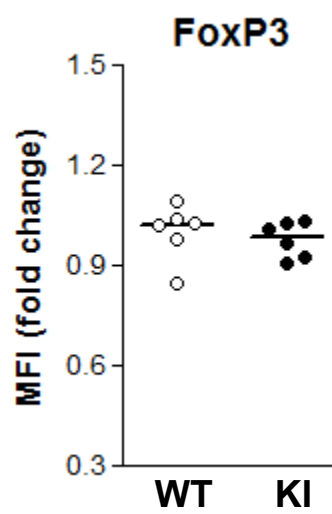

Supplement: NIHMS584943-supplement-Supporting_Information.pdf [file NIHMS584943-supplement-Supporting_Information.pdf]
